1 **Structure, culture, and predicted function of the gut microbiome of the Mormon cricket**

2 *Anabrus simplex* (Orthoptera: Tettigoniidae)

3

4 Chad C. Smith<sup>1</sup>, Robert B. Srygley<sup>2</sup>, Frank Healy<sup>3</sup> Karthikeyan Swaminath<sup>1</sup>, Ulrich G. Mueller<sup>1</sup>

5

6 <sup>1</sup>Department of Integrative Biology, University of Texas at Austin, 1 University Station C0990,

7 Austin, TX 78724

8 <sup>2</sup>USDA-Agricultural Research Service, Northern Plains Area Research Laboratory, 1500 Central

9 Avenue, Sidney MT 59270

10 <sup>3</sup>Department of Biology, Trinity University, 1 Trinity Pl., San Antonio, TX 78212

11

12 Corresponding author: Chad C. Smith

13 Email: chad.smith123@gmail.com

14 Header: Structure of the Mormon cricket gut microbiome

15

16

## 17 SUMMARY

- 18 1. The gut microbiome of insects plays an important role in their ecology and evolution,  
19 participating in nutrient acquisition, immunity, and behavior. Microbial community  
20 structure within the gut is heavily influenced by differences among gut regions in  
21 morphology and physiology, which determine the niches available for microbes to  
22 colonize.
- 23 2. We present a high-resolution analysis of the structure of the gut microbiome in the  
24 Mormon cricket *Anabrus simplex*, an insect known for its periodic outbreaks in the  
25 western United States and nutrition-dependent mating system. The Mormon cricket  
26 microbiome was dominated by eleven taxa from the Lactobacillaceae,  
27 Enterobacteriaceae, and Streptococcaeae. While most of these were represented in all gut  
28 regions, there were marked differences in their relative abundance, with lactic-acid  
29 bacteria (Lactobacillaceae) more common in the foregut and midgut and enteric  
30 (Enterobacteriaceae) bacteria more common in the hindgut.
- 31 3. Differences in community structure were driven by variation in the relative prevalence of  
32 three groups: a *Lactobacillus* in the foregut, *Pediococcus* lactic-acid bacteria in the  
33 midgut, and *Pantoea agglomerans*, an enteric bacterium, in the hindgut. These taxa have  
34 been shown to have beneficial effects on their hosts in insects and other animals by  
35 improving nutrition, increasing resistance to pathogens, and modulating social behavior.
- 36 4. Using PICRUSt to predict gene content from our 16S rRNA sequences, we found  
37 enzymes that participate in carbohydrate metabolism and pathogen defense in other  
38 orthopterans. These were predominately represented in the hindgut and midgut, the most  
39 important sites for nutrition and pathogen defense.

40 5. Phylogenetic analysis of 16S rRNA sequences from cultured isolates indicated low levels  
41 of divergence from sequences derived from plants and other insects, suggesting that these  
42 bacteria are likely to be exchanged between Mormon crickets and the environment.

43 6. Our study shows strong spatial variation in microbiome community structure, which  
44 influences predicted gene content and thus the potential of the microbiome to influence  
45 host function.

46 Keywords: symbiosis, alimentary tract, immunity, nutrition, PICRUSt, carbohydrate  
47 metabolism, lactic acid bacteria, Enterobacteriaceae, katydid, bacteria, metagenomic

48

## 49 **INTRODUCTION**

50 Insects are the most speciose and abundant taxa in the animal kingdom, playing a key ecological  
51 role in many of the world's ecosystems. Symbioses between insects and their microbial  
52 associates has undoubtedly contributed to their success, providing the capability to degrade  
53 recalcitrant food, to supplement nutrient-deficient diets, to protect them from their natural  
54 enemies, and to modulate the expression of social behavior (Engel & Moran 2013; Douglas  
55 2015). Among the niches available to occupy the host, the gut houses the largest and most  
56 diverse microbiome in insects (Engel & Moran 2013; Douglas 2015) and other animals (Ley *et*  
57 *al.* 2008; Cho & Blaser 2012). Gut morphology and physiology vary markedly along the  
58 alimentary tract, resulting in an environmental gradient that influences, and is influenced by, the  
59 microbial communities that populate it (Dillon & Dillon 2004; Engel & Moran 2013).

60         The insect gut consists of three regions that are analogous to that in mammals, the  
61 foregut, the midgut and the hindgut, each of which contributes to a different aspect of gut  
62 function (Douglas 2013). The foregut serves as the entry point for food, where it is stored in the  
63 crop before passing through the proventriculus, a valve that can also be modified to mechanically  
64 filter food (Woodring & Lorenz 2007; Douglas 2013) and even microbes (Lanan *et al.* 2016).  
65 Digestion and absorption of nutrients begins at the midgut, which, in some species, contains  
66 specialized crypts that house microbes that aid in insect nutrition (Kikuchi, Meng & Fukatsu  
67 2005; Bistolas *et al.* 2014). Host immune factors have been shown to play an important role in  
68 regulation of commensal microbes in the midgut (Ryu, Ha & Lee 2010; Buchon, Broderick &  
69 Lemaitre 2013), some of which protect the host from pathogens (Forsgren *et al.* 2010).  
70 Following the midgut is the hindgut, which is comprised of the ileum, colon, and rectum.  
71 Malphigian tubules permeate the anterior hindgut, excreting nitrogenous waste and other solutes

72 from the hemocoel that can provide nutrients for dense populations of microbes (Bignell 1984).  
73 In some species, dense bristle-like structures in the ileum (Woodring & Lorenz 2007) and rectal  
74 papillae (Hunt & Charnley 1981) provide attachment sites for bacteria, some of which fix  
75 nitrogen (Tai *et al.* 2016), degrade recalcitrant plant polymers (Kaufman & Klug 1991; Engel &  
76 Moran 2013), and prevent infection (Dillon & Charnley 2002).

77         The Mormon crickets *Anabrus simplex* (Orthoptera: Tettigoniidae) is an economically  
78 important shield-backed katydid distributed throughout the Western United States. Mormon  
79 crickets can form dense aggregations of millions of individuals spread over 10 kilometers long  
80 and several kilometers wide, feeding on forbes, grasses, and agricultural crops as they march in  
81 migratory bands across the landscape (MacVean 1987; Simpson *et al.* 2006). Mormon crickets  
82 are also emerging as a model for the study of how social interactions and diet influence  
83 immunity (Srygley *et al.* 2009; Srygley & Lorch 2011) and the microbiome (Smith *et al.* 2016).  
84 Differences in population density are linked to reproductive behavior, as in high density  
85 populations, protein-limited females compete for access to males to gain access to a  
86 proteinaceous “nuptial gift” males produce for females during copulation (Gwynne 1984). While  
87 consumption of male nuptial gifts by females does not influence the composition of the  
88 microbiome, sexually inactive females experience a dramatic decline in *Pediococcus* lactic-acid  
89 gut bacteria compared to sexually active females (Smith *et al.* 2016). Lactic-acid bacteria are  
90 common associates of the alimentary tract and regarded for their beneficial effects on immune  
91 function and nutrition in animals, including insects (Forsgren *et al.* 2010; Storelli *et al.* 2011;  
92 Erkosar *et al.* 2015).

93         We characterize the structure of the gut microbiome of Mormon crickets and infer their  
94 evolutionary relationships using a combination of culture-dependent and culture-independent

95 approaches. Our aims are to determine whether gut microbial communities vary along the  
96 alimentary tract in the Mormon cricket and to infer their potential to influence host function  
97 based on their known taxonomic associations with other insects and by employing bioinformatic  
98 tools that predict metabolic capabilities from 16S rRNA sequences. We also establish methods  
99 for isolating Mormon cricket gut microbiota in culture to permit future experimental  
100 manipulations of the gut microbiome and build genomic resources to infer their evolution and  
101 function.

## 102 **MATERIALS AND METHODS**

### 103 *Animal collection and tissue processing*

104 Mormon crickets were obtained from field (n=5) and laboratory-raised (n=8) collections. Wild  
105 females were caught in EK Mountain (43°47'58"N, 106°50'31"W, 1752 m) near Kaycee,  
106 Wyoming in the summer of 2014, immediately preserved in 100% ethanol, and stored at -80°C  
107 until dissection. Laboratory-raised Mormon crickets were derived from eggs collected from  
108 individuals caught on Paint Rock Road (44°27'52"N, 107°27'37"W, 2654 m) in the Bighorn  
109 Mountains and fed a mixture of wheat bran, wheat germ, sunflower, mixed bird seeds, tropical  
110 fish flakes, fresh Romaine lettuce (added daily), and water *ad libitum*.

111 Mormon crickets were dissected using flame-sterilized tools after rinsing in 1% bleach  
112 for 3 min followed by two rinses in autoclaved distilled water to remove bacteria on the  
113 exoskeleton. DNA from the foregut (crop and proventriculus), midgut (ventriculus), ileum, and  
114 rectum (Fig. 1) of laboratory-raised crickets was extracted with MoBio Powersoil<sup>®</sup> as in Smith et  
115 al. (2016). Foregut (crop and proventriculus), midgut (ventriculus), and hindgut tissue (ileum and  
116 rectum combined) was extracted from field-collected animals using a bead-beating/phenol-  
117 chloroform extraction protocol (see supplementary material). DNA extraction methods can

118 influence the representation of taxa in 16S rRNA metagenomic studies (Yuan *et al.* 2012),  
119 however our aim here is not to make inferences about differences between field and laboratory-  
120 raised animals but differences among tissue types. We include the source of the animal (field or  
121 laboratory) and as a covariate in our statistical analyses to account for variation due to  
122 source/DNA extraction method (see Statistics).

### 123 *Sequencing and Bioinformatics*

124 The variable V4 region of 16S rRNA gene was amplified with universal primers (Hyb515F: 5'-  
125 GTGYCAGCMGCCGCGGTA -3', Hyb806R: 5'-GGACTACHVGGGTWTCTAAT-3') and  
126 sequenced on the Illumina Miseq V3 platform. DADA2 1.1.5 (Callahan *et al.* 2016) was used to  
127 process the raw sequencing data and taxonomy was assigned with the Greengenes 13.8 database  
128 at 97% identity (see supplementary material). Sequence variants that comprised an average of  
129 less than 1% of the reads recovered within a given Mormon cricket were removed prior to  
130 analysis using phyloseq 1.16.2 (McMurdie & Holmes 2013).

### 131 *Metagenomic predictions*

132 We used PICRUSt (Phylogenetic Investigation of Communities by Reconstruction of  
133 Unobserved States) v1.1.0 (Langille *et al.* 2013) to estimate the functional gene content of our  
134 samples. PICRUSt generates metagenomic predictions from 16S rRNA data using annotations of  
135 sequenced genomes in the IMG database. Nearest sequenced taxon index (NSTI) values were  
136 small (mean  $\pm$  sd:  $0.03 \pm 0.01$ , range: 0.006-0.040), indicating the taxa in our samples were  
137 closely related to the genomes in the IMG database (see supplementary material). Greengenes  
138 IDs used by PICRUSt to construct the phylogenetic tree were assigned to sequence variants  
139 using Qiime 1.9 (Caporaso *et al.* 2010), and the Kyoto Encyclopedia of Genes and Genomes  
140 (KEGG) database was used for functional classification.

141 *Bacterial Abundance*

142 The abundance of bacteria was estimated using qPCR following Powell et. al (2014) from  
143 laboratory-raised (n=8) and field-caught (n=8) Mormon crickets (see supplementary  
144 information). Universal 16S rRNA gene primers 27F (5'-AGAGTTTGATCCTGGCTCAG-3')  
145 and 355R (5'-CTGCTGCCTCCCGTAGGAGT-3') were used to amplify all copies of the 16S  
146 rRNA gene in tissue samples from laboratory (n=8) and field caught individuals (n=8) and copy  
147 number quantified with standard curves from the cloned target sequence (Powell *et al.* 2014)

148 *Culturing and phylogenetic analysis*

149 Five lab-reared female Mormon crickets were surface sterilized in 1% bleach for three min,  
150 rinsed twice in sterile water and dissected using flame-sterilized tools. Gut tissue was  
151 homogenized for 10 s with a bead beater using autoclaved 3.2mm stainless steel beads in sterile  
152 PBS. Homogenates were plated onto tryptic soy agar, brain heart infusion agar, nutrient agar, or  
153 Man–Rogosa–Sharpe agar (BD), cultured in anaerobic or Campy (low O<sub>2</sub>) Gaspak pouches  
154 (Becton, Dickinson and Company, Franklin Lakes, NJ) at 37°C for 24-48 hours, and individual  
155 colonies passaged three times to obtain pure isolates. DNA was then extracted with chelex and  
156 the 16S gene amplified for Sanger sequencing using 27F (5'-AGAGTTTGATCCTGGCTCAG-  
157 3') and 1492R (5'-GGTTACCTTGTTACGACTT-3') primers (see supplementary material).

158

159 *Phenotypic assays*

160 Fresh overnight cultures of all isolates were used for microscopic analysis. Lactobacillaceae  
161 isolates were cultured in Man–Rogosa–Sharpe medium and Enterobacteriaceae were cultured in  
162 nutrient broth or LB medium. Biochemical tests were done following Bridson (1998). Motility



163 was determined using SIM medium and microscopic examination of culture wet mounts. Man–  
164 Rogosa–Sharpe or nutrient broth containing 1 g/L potassium nitrate was used for nitrate  
165 reduction tests. Fermentation tests were done anaerobically in Man–Rogosa–Sharpe and nutrient  
166 broth media with the addition of indicated sugars to 1% w/v final concentration.

### 167 *Statistics*

168 Analyses were performed in R 3.3.1 (R Core Development Team 2013). Sequence tables were  
169 rarified at 1300 reads using phyloseq (McMurdie & Holmes 2013), resulting in the exclusion of  
170 hindgut samples from two field-caught females that had a low number of reads. Alpha diversity  
171 was compared among tissue types and between origin of subject (field vs. lab) with a linear  
172 mixed model (Bates *et al.* 2013), entering the individual ID as a random effect to account for  
173 within-subject correlations in diversity. Species richness, Chao1, and the Shannon-Weiner  
174 diversity index were calculated. Post-hoc comparisons among gut regions were performed using  
175 a Tukey test (Hothorn, Bretz & Westfall 2008).

176 Beta diversity among gut tissue types and between animal source (field vs. lab) was  
177 assessed with a distance-based redundancy analysis (db-RDA) in vegan 2.3 (Oksanen *et al.*  
178 2015), specifying a principal components ordination of Bray-Curtis distances. Statistical  
179 significance of the terms in the db-RDA model was determined by 999 permutations of the  
180 distance matrix in vegan, restricting the permutations to within each individual to retain the  
181 nested structure of the data. The same procedure was also used to examine variation among  
182 tissue types in the abundance of KEGG pathways, except nonmetric multidimensional scaling  
183 was used for ordination.

184 We assessed the difference in taxon abundance among tissue types in univariate analyses  
185 by fitting the data to a negative binomial generalized linear mixed model (Bates *et al.* 2013),

186 specifying the individual ID as the random effect and the tissue type and animal source (field vs.  
187 lab) as fixed effects. A similar procedure was used to assess differences in 16S rRNA gene copy  
188 number between tissue types and animal source, except a normal distribution was specified.  
189 Likelihood ratio tests were used to determine the statistical significance of each factor (Venables  
190 & Ripley 2002). Goodness-of-fit was assessed by with a Chi-square test (Faraway 2006) and  
191 homoscedasticity was assessed by examination of residual plots. Nonparametric methods were  
192 used in univariate analyses of the metagenomic predictions because no distribution provided a  
193 reasonable fit to the data. P-values were adjusted for multiple tests using the false discovery rate  
194 (Benjamini & Hochberg 1995).

## 195 **RESULTS**

### 196 *Spatial structure of the gut microbiome*

197 We recovered 11 dominant sequence variants from field and lab-raised individuals (Fig. 2), with  
198 the remaining 749 sequence variants comprising <1% of the sequences from a given Mormon  
199 cricket. Field and laboratory-raised individuals shared 7 of the 11 sequence variants, including  
200 the most abundant *Pediococcus acidilactici* OTU that varied with mating status in a previous  
201 study (*P. acidilactici* 102222; Smith *et al.* 2016). The remaining five shared sequence variants  
202 were two Lactobacillaceae (*Lactobacillus sp* and *P. acidilactici* 2), two Enterobacteriaceae  
203 (*Pantoea agglomerans* and a *Klebsiella sp*) and one Streptococcaceae (*Lactococcus garvieae*).  
204 Field-caught Mormon crickets had three taxa that were not shared with laboratory-raised  
205 individuals, while lab-raised individuals had two taxa that were not shared with field individuals  
206 (Fig. 2). Guts from two laboratory individuals were almost completely comprised of the enteric  
207 bacterium *Pantoea agglomerans* (99.3% and 80.8% of reads respectively), so we conducted our  
208 analysis with and without these individuals.

209 Species richness and diversity differed among gut regions and were higher in field  
210 compared to lab-raised animals (Table 1, Fig. 3). There was no significant interaction between  
211 collection source and tissue type (Table 1), indicating that differences in alpha diversity among  
212 tissue types were shared between lab and field-caught animals. We found that the midgut was the  
213 most diverse part of the gut with two of the three measures of alpha diversity (species richness  
214 and the Chao1 diversity estimator), while the hindgut and foregut had similar levels of richness  
215 and diversity. The third metric (Shannon-Weiner) also found the foregut to be the least diverse  
216 region, but differed in that the midgut and hindgut had similar levels of species diversity (Table  
217 1, Fig 3).

218 The db-RDA analysis revealed that the structure of the gut microbiome also varied  
219 among gut regions and between field and laboratory animals (Table 2, Fig. 4a). The non-  
220 significant interaction in this analysis, however, indicates that the differences in community  
221 structure among tissue types were consistent between field and laboratory-raised individuals  
222 (Table 2). To determine which members of the gut microbiome varied among gut regions, we  
223 plotted the taxa scores from db-RDA analyses of field and laboratory Mormon crickets (Figure  
224 S1a). Three groups of bacteria appeared to separate along the gut axis: a *Lactobacillus sp.* lactic-  
225 acid bacterium associated with the foregut, *Pediococcus* lactic-acid bacteria were associated with  
226 the midgut, and *Pantoea agglomerans*, an enteric bacterium, was found in association with the  
227 hindgut. Inspection of the plots from laboratory animals, where the ileum and rectum of the  
228 hindgut were dissected separately, indicate that *P. agglomerans* is more abundant in the rectum,  
229 while the composition of the ileum, which is separated from the rectum by the colon, closely  
230 resembled that of the midgut (Figure S1b).

231 Univariate analyses of these three groups largely confirmed the pattern in the ordination  
232 (Table 3, Fig. 2, Fig. S2). The interaction between tissue type and source was not significant in  
233 any of the analyses and dropped to estimate the differences in abundance between tissue types.  
234 *Lactobacillus sp.* was three times more common in the foregut than in the midgut ( $\beta=1.4 \pm 0.50$ ,  
235  $p=0.02$ ) and seven times more abundant in the foregut than in the hindgut ( $\beta=2.0 \pm 0.51$ ,  
236  $p<0.001$ ). *Pediococcus* were similar in abundance in the midgut and hindgut but 4.7 times more  
237 common in these areas than the foregut ( $\beta=1.1 \pm 0.36$ ,  $p=0.006$ ). *P. agglomerans* was 209 times  
238 more abundant in the hindgut than in the foregut ( $\beta=3.8 \pm 0.87$ ,  $p<0.001$ ) and twelve times more  
239 abundant in the hindgut than in the midgut ( $\beta=2.5 \pm 0.82$ ,  $p=0.007$ ).

#### 240 *Abundance of bacteria from 16S rRNA qPCR*

241 The number of copies of bacterial 16S rRNA genes was significantly different among tissue  
242 types, as indicated by the significant interaction between tissue type and the source of the  
243 Mormon crickets (Analysis of deviance: Source,  $F_{1,14}=25.9$ ,  $p<0.001$ ; tissue type,  $F_{3,161}=7.8$ ,  
244  $p<0.001$ ; Interaction,  $F_{3,161}=2.8$ ,  $p=0.04$ , Fig. 7). We decomposed the interaction to determine  
245 how the total number of 16S rRNA copies differed among tissue types within field and  
246 laboratory-raised animals. The major difference between the two sources was that in wild  
247 Mormon crickets, the midgut had the lowest abundance of all gut regions, while in laboratory-  
248 raised individuals, both the midgut and the ileum had the lowest abundance of bacterial 16S  
249 rRNA genes (Table S1, Fig. 5).

#### 250 *PICRUSt metagenomic predictions*

251 PICRUSt analysis of 16S rRNA sequence variants recovered 5,891 KEGG orthologs associated  
252 with 328 metabolic pathways. The representation of the predicted KEGG pathways differed  
253 significantly among gut regions in both the full and reduced datasets, while the source of the

254 animals had a significant influence in the full dataset but not the reduced dataset (Table 2, Fig.  
255 4b). Neither analysis, however, showed an interaction between tissue type and whether an animal  
256 was wild or lab-reared, indicating that metagenomic predictions differed among tissue types in  
257 similar ways (Table 2). Univariate analyses found significant differences among tissue types in  
258 most KEGG pathways (Table S2), including those that could affect host-microbe interactions via  
259 their role in nutrition, immunity, degradation of xenobiotics, and production of secondary  
260 metabolites (Fig. 6). In these functional groups, the hindgut exhibited the most abundant  
261 representation of each KEGG category, followed by the midgut and then the foregut (Fig. 6).

## 262 Nutrition

263 We searched our metagenomic predictions for specific bacterial genes known to  
264 contribute to host nutrition in orthopterans. We queried our database for enzymes capable of  
265 metabolizing the complex plant carbohydrates xylan, pectin, raffinose, and galactomannan,  
266 which are metabolized by gut bacteria in the house cricket *Achetus domesticus* (Kaufman & Klug  
267 1991), and cellulose, an important component of the plant cell wall. We found KEGG orthologs  
268 involved in the metabolism of all these complex plant polymers, except galactomannan. The  
269 pectin metabolic pathway was also incomplete. Only pectinesterase, the first of three enzymes  
270 involved in pectin metabolism, was found among the eleven dominant taxa in Mormon crickets,  
271 although the remaining two enzymes were represented in the minority members (i.e. <1% of 16S  
272 rRNA sequences, see *Sequencing and Bioinformatics*) of the gut microbiome.

273 The abundance of KEGG orthologs for carbohydrate metabolism in our samples were  
274 most pronounced in the hindgut (Table S3, Fig. 7a) and dominated by the enteric bacteria,  
275 particularly *Klebsiella sp.* and Enterobacteriaceae 1 (Fig 7b). Lactic-acid bacteria, however, were  
276 also represented in predictions for raffinose metabolism and enzymes capable of participating in

277 the degradation of cellulose to glucose via cellulose glucohydrolase, but not in degrading  
278 cellulose to cellulose (Fig 7b).

279 Gut bacteria might also play a role in the production of the essential amino acid  
280 phenylalanine via the shikimate pathway, which is found in microbes and plants but not in  
281 animals (Herrmann & Weaver 1999). Phenylalanine is required for stabilization of the cuticle  
282 following molting (Bernays & Woodhead 1984) and is converted to tyrosine, the precursor of  
283 melanin, a key component of the insect immune response (González-Santoyo & Córdoba-  
284 Aguilar 2012). All enzymes in the shikimate pathway were represented in our metagenomic  
285 predictions (Fig. S3), although prephenate hydrogenase, which is required for phenylalanine  
286 synthesis, was only represented in *Lactococcus garviae*. *L. garviae* abundance thus might  
287 influence the availability of phenylalanine for Mormon crickets, unless they are able to acquire it  
288 in sufficient quantities directly from their diet.

## 289 Immunity

290 In the locust *Schistocera gregaria* (Orthoptera), four phenols have been shown to  
291 increase resistance to microbial pathogens (Dillon & Charnley 1988, 1995): hydroquinone, 3,4-  
292 dihydroxybenzoic acid, p-hydroxybenzoic acid, and 4,5-dihydroxybenzoic acid. We found  
293 enzymes associated with the production of all these compounds except for 4,5-dihydroxybenzoic  
294 acid, which was not annotated in the KEGG database. Hydroquinone production was represented  
295 by the enzyme arbutin 6-phosphate glucohydrolase, which metabolizes arbutin, a phenolic  
296 glycoside present in leaf and fruit tissue of many plants (Xu *et al.* 2015).

297 Two enzymes were found capable of producing 3,4-dihydroxybenzoic acid. The first,  
298 vanillate monooxygenase, demethylates vanillic acid, a compound derived from lignin (Bugg *et*  
299 *al.* 2011). This is also the pathway proposed for 3,4-dihydroxybenzoic acid production in locusts

300 based on the abundance of vanillic acid in their feces (Dillon & Charnley 1988, 1995). The  
301 second, p-hydroxybenzoate 3-monooxygenase, oxidizes p-hydroxybenzoic acid, one of the other  
302 antimicrobial phenols in locusts (Dillon & Charnley 1995). The most likely source of p-  
303 hydroxybenzoic acid in the diet of Mormon crickets is benzoic acid, which is a precursor to  
304 salicylic acid in plants (Raskin 1992). The enzyme responsible for catalyzing the conversion of  
305 benzoic acid to p-hydroxybenzoic acid (benzoate 4-monooxygenase), however, was not found  
306 among the 11 dominant taxa in our samples, although it was present in the minority members of  
307 the Mormon cricket gut microbiome. Production of p-hydroxybenzoic acid in appreciable  
308 concentrations is thus less likely than for hydroquinone or 3,4-dihydroxybenzoic acid.

309       Like carbohydrate metabolism, the hindgut (Fig. 7c) and enteric bacteria (Fig. 7d)  
310 dominated the abundance of KEGG orthologs implicated in the production of antimicrobial  
311 phenols in our samples, with the exception of hydroquinone, which was represented to varying  
312 degrees among the lactic-acid bacteria. Notably, *P. agglomerans*, which has been reported to  
313 participate in the production of 3,4-dihydroxybenzoic acid in locusts (Dillon & Charnley 1995),  
314 was not among taxa responsible for the occurrence of vanillate monooxygenase in our samples  
315 (Fig 7d).

316       Finally, we searched for three other known contributors to pathogen defense: bacterocins,  
317 antibiotics, and lactate dehydrogenase, which provides protection from pathogens in the gut by  
318 reducing pH (Servin 2004). We found lactate dehydrogenase to be equally represented among  
319 gut regions (Fig 7c), and lactic-acid bacteria were the main contributors to our samples (Fig. 7d).  
320 We found three bacteriocins in the KEGG database: nisin, mutacin, and *blp*-derived bacteriocins.  
321 None of these were found in our metagenomics predictions, perhaps not surprising considering  
322 their association with *Streptococcus*, which was not among the top 11 taxa in our samples (Fig.

323 2). The bacteriocins we would expect to find based on taxonomy (e.g. pediocin for *Pediococcus*)  
324 were not annotated in the KEGG database.

325 Turning to the antibiotics, we found enzymes involved in the production of streptomycin,  
326 penicillin, and novobiocin, but not all enzymes required for their synthesis were present (data not  
327 shown). We did find  $\beta$ -lactamase, which confers resistance to  $\beta$ -lactam antibiotics (e.g.  
328 penicillins, cephalosporins, monobactams, and carbapenems; Drawz & Bonomo 2010),  
329 represented among all the Enterobacteriaceae and *Pediococcus* taxa in our samples, but not  
330 among *Lactobacillus sp.* other Lactobacillaceae (data not shown). This suggests that lactate  
331 production and antibiotic resistance could play a role in microbe-microbe interactions in the  
332 Mormon cricket gut microbiome.

### 333 *Phylogenetic analysis of cultured isolates*

334 Thirteen strains were cultured from the Mormon cricket gut based on 99% sequence similarity of  
335 their near full-length 16S rRNA genes (mean  $\pm$  sd: 1406  $\pm$  30bp). Six were lactic-acid bacteria  
336 (Lactobacillaceae) and seven were enteric bacteria (Enterobacteriaceae).

337 The lactic-acid bacteria fell into two clades in our phylogenetic analysis (Fig. 8). The first  
338 clade was comprised of *Pediococcus acidilactici* isolates derived from environmental sources,  
339 such as plants and various human foodstuffs, as well as strains from the human gut. Similarity to  
340 sequences from the BLAST search was high (>99.5%) and branch lengths were short, indicating  
341 that *Pediococcus* from the Mormon cricket gut are not highly derived from their relatives, as has  
342 been found for *Lactobacillus* species isolated from bees (Fig. 8; McFrederick *et al.* 2013).

343 Our search for *Pediococcus* sequences from insect guts in Genbank recovered sequences  
344 from the termites *Macrotermes bellicosus* and *M. subhyalinus*, which formed their own well-  
345 supported clade (Fig 8). Cultured *Pediococcus acidilactici* shared 100% sequence identity in the



346 V4 region with the *P. acidilactici* 1 phylotype sequenced using the Illumina platform in this  
347 study and with the *P. acidilactici* (102222) phylotype associated with variation in mating status  
348 in Mormon crickets (Smith *et al.* 2016). Morphologically, *Pediococcus acidilactici* were  
349 nonmotile and spherical (0.8 – 1.0  $\mu\text{m}$ ), often dividing to form pairs as described for other  
350 *Pediococcus*. As other members of the genus, the *P. acidilactici* were gram-positive, non-motile,  
351 facultatively anaerobic, grow at low pH, and produce lactate from lactose (Table S2).

352 The second clade of lactic-acid bacteria was comprised primarily of plant-associated  
353 *Lactobacillus*. Unlike *P. acidilactici*, these *Lactobacillus* formed a distinct clade with good  
354 branch support (Fig 8), indicating it is genetically distinct enough at the 16S rRNA locus to  
355 distinguish itself from other clades in the phylogeny. Similar to *P. acidilactici*, these  
356 *Lactobacillus* had high sequence similarity (>99.5%) to other members of the clade and a short  
357 branch length, indicating that while it is distinct enough to form its own clade, it is not highly  
358 derived from its relatives at the 16S rRNA locus.

359 Our Genbank search for *Lactobacillus* isolated from insect guts found sequences from  
360 ants, bees, and termites, and fruit flies, all of which fell into a different clade than *Lactobacillus*  
361 isolated from Mormon crickets. *Lactobacillus* from these taxa thus appear to have a different  
362 evolutionary history. *Lactobacillus* isolates shared 100% sequence identity in the V4 region with  
363 the Lactobacillaceae 2 phylotype sequenced using the Illumina platform in this study.  
364 Morphologically, these *Lactobacillus* appear as non-motile straight rods, approximately 1.3-2  
365  $\mu\text{m}$  in length and 0.8-1.0  $\mu\text{m}$  wide and are gram-positive, non-motile, facultatively anaerobic,  
366 grow at low pH, and produce lactate from lactose (Table S2).

367 The seven Enterobacteriaceae strains were most similar to *Enterobacter* strains in our  
368 BLAST search, which recovered sequences from a variety of plant and animal sources (sequence

369 similarity=98.7-99.8%). Our survey of Genbank found *Enterobacter* from alimentary tracts of a  
370 diverse group of insects, including termites, cockroaches, flies, beetles, stink bugs, bees, ants,  
371 and moths. Like other studies (Brenner *et al.* 2005), however, the 16S rRNA gene did not have  
372 enough signal to resolve relationships among *Enterobacter* and its relatives (data not shown) so  
373 we present a simpler phylogeny with the Mormon cricket isolates and type strains from the  
374 family (Fig. 9).

375 We found that our Mormon cricket isolates were interspersed with *Enterobacter*,  
376 *Klebsiella*, and *Escherichia* type strains. A multilocus sequencing approach is thus needed to  
377 improve the inference (Brenner *et al.* 2005). All seven strains isolated from Mormon crickets had  
378 100% identity at the V4 region with the *Klebsiella* phylotype sequenced on the Illumina  
379 platform, however the phylogenetic (Fig. 9) and phenotypic data (Table S2) suggest that  
380 *Klebsiella* is unlikely to be a correct taxonomic assignment. Unlike most *Klebsiella*, cultured  
381 strains were motile, which is more typical of *Enterobacter* and other Enterobacteriaceae  
382 (Brenner *et al.* 2005). Morphologically, all isolates were straight rods, approximately 0.8-1.0  $\mu\text{m}$   
383 in length and 0.6-0.8  $\mu\text{m}$  wide. Strains were gram-negative and facultatively anaerobic (Table  
384 S2).

## 385 **DISCUSSION**

386 We found striking differences in the diversity and structure of the gut microbiome in the  
387 Mormon cricket *Anabrus simplex*. While most taxa were represented in the foregut, midgut and  
388 hindgut, there were dramatic differences in relative abundance within the Lactobacillaceae and  
389 between the Lactobacillaceae and Enterobacteriaceae, the main families recovered in our culture  
390 and culture-independent studies. Predictions of their metabolic capabilities using PICRUSt  
391 suggest the potential for these gut bacteria to participate in the metabolism of complex

392 carbohydrates and defense against microbial pathogens, particularly among the enteric bacteria  
393 in the midgut and hindgut, and to a lesser extent, the lactic-acid bacteria. Finally, our  
394 phylogenetic analysis of cultured isolates found that Mormon cricket gut bacteria are not highly  
395 derived from related bacteria associated with plants or the guts of other animals, suggesting that  
396 gut bacteria are either acquired from the environment in each generation or have not been  
397 restricted to Mormon crickets over appreciable periods of evolutionary time. Our findings have  
398 important implications for our understanding of the ecological and evolutionary processes that  
399 influence the assembly and function of gut microbial communities, as it suggests that host-  
400 microbe and microbe-microbe interactions shape the abundance and distribution of the gut  
401 microbiome.

402         Our finding that bacterial abundance is lower in the midgut is in agreement with reports  
403 from other orthopterans (Ulrich, Buthala & Klug 1981; Hunt & Charnley 1981) and insects  
404 (Köhler *et al.* 2012), and has been attributed to characteristics that make the midgut less  
405 hospitable to bacteria than other regions of the alimentary tract (Douglas 2015). The midgut in  
406 insects secretes a host of digestive enzymes, is immunologically active, and lined by the  
407 peritrophic membrane, which acts as a protective barrier that restricts microbes to the lumen and  
408 protects the epithelium (Douglas 2015). In the two orthopterans that have been studied in detail,  
409 bacteria are found in the midgut lumen but not in association with the epithelium (Hunt &  
410 Charnley 1981; Mead, Khachatourians & Jones 1988). As a consequence, midgut bacteria might  
411 need to be continually replenished from ingested food (Blum *et al.* 2013) because the peritrophic  
412 membrane is continually shed into the hindgut. In some insects, specialized midgut crypts  
413 provide niches that microbes colonize (Kikuchi *et al.* 2005; Bistolas *et al.* 2014), however we did  
414 not observe analogous structures in Mormon crickets (Fig. 1).

415           The midgut is particularly vulnerable to pathogens because the lack of an endocuticle  
416 leaves the epithelium exposed once the peritrophic membrane is penetrated (Lehane &  
417 Billingsley 1996). The Mormon cricket midgut was populated by lactic-acid bacteria, with  
418 *Pediococcus* specifically exhibiting greater abundance in the midgut (and hindgut) than in the  
419 foregut. Lactic-acid bacteria are known for their beneficial effects in insects, increasing  
420 resistance to parasites in bees (Forsgren *et al.* 2010) and promoting development in fruit flies by  
421 enhancing proteolytic activity (Erkosar *et al.* 2015) and upregulating host ecdysone and insulin-  
422 like peptides (Storelli *et al.* 2011). Lactic-acid bacteria are also known to suppress pathogenic  
423 bacteria by reducing pH through the production of lactate and by producing a number of  
424 antimicrobial compounds, such as hydrogen peroxide and bacteriocins (Cintas *et al.* 2001).

425           A previous study found that sexual interactions in Mormon crickets influences the  
426 abundance of three *Pediococcus* phylotypes (Smith *et al.* 2016), however spatial information on  
427 where in the gut *Pediococcus* is located has been unavailable until now. *Pediococcus* in the  
428 midgut could provide immunological or nutritional benefits to Mormon crickets, as has been  
429 shown for *P. acidilactici* in other animals (Castex *et al.* 2008, 2009). We found that the capacity  
430 for lactate production in our samples was dominated by *Pediococcus* and other lactic-acid  
431 bacteria, although the abundance of the enzyme mediating lactate production was not higher in  
432 the midgut relative to other regions based on our metagenomics predictions. The cultured isolates  
433 of *P. acidilactici* obtained from Mormon crickets in this study will enable future experimental  
434 and comparative genomic approaches to evaluate these hypotheses.

435           Lactic-acid bacteria were also common in the foregut, which was dominated by a  
436 *Lactobacillus* that averaged 73.9% of the sequences recovered from this region. Bignell (1984)  
437 noted that the foregut of insects tends to be the most acidic compartment, however studies that

438 measure the physiochemical environment and characterize microbiome composition of the  
439 foregut are rare (but see Köhler *et al.* 2012). This is because the endocuticle, lack of  
440 differentiated cells for absorption of nutrients, and frequent purging of consumed material into  
441 the midgut provides little opportunity for foregut microbes to contribute to host nutrition. The  
442 large differences in community structure between the foregut and the rest of the alimentary tract  
443 in our study does illustrate the dramatic transition in microbial communities between what is  
444 ingested and what can colonize the more distal regions of the gut. Our metagenomics predictions  
445 also suggest that the foregut is not the site of extensive carbohydrate metabolism or pathogen  
446 defense for most of the pathways we examined.

447         In contrast to the foregut and midgut, the hindgut was characterized by a dramatic  
448 increase in enteric bacteria (Enterobacteriaceae). Ordination of the laboratory Mormon cricket  
449 samples indicated that the rectum, not the ileum, was primarily responsible for the difference in  
450 community structure in the hindgut. Enterobacteriaceae comprised 83.5% of the sequences from  
451 the rectum compared to 57.5% from the ileum in laboratory-raised animals, which was more  
452 similar to the midgut in community structure (Fig. 4a). This distinction is potentially important  
453 because higher digestive efficiency in conventional compared to germ-free crickets has been  
454 attributed to microbial colonization of the ileum in the orthopteran *A domesticus* (Kaufman &  
455 Klug 1991).

456         Metabolism of the specific complex carbohydrates attributed to bacteria in this study  
457 were also identified in our metagenomic predictions and localized to the hindgut, as well as  
458 enzymes involved in the production of the essential amino acid phenylalanine via the shikimate  
459 pathway. Phenylalanine is a precursor for tyrosine, which is required to stabilize the cuticle  
460 during molting (Bernays & Woodhead 1984) and in phenoloxidase synthesis, an important

461 component of the insect immune system (González-Santoyo & Córdoba-Aguilar 2012).  
462 Tradeoffs between allocation of tyrosine to immune function and cuticle formation during  
463 development in Mormon crickets (Srygley 2012) might be impacted by microbial contributions  
464 to amino acid production if sufficient quantities of these amino acids are not obtained directly  
465 from their diet.

466         Of the three enteric bacteria represented in this study, *P agglomerans* was common to  
467 both field and lab individuals and increased in abundance in the hindgut. *Pantoea* are known  
468 plant pathogens and have been associated with a variety of medical conditions in humans  
469 (Walterson & Stavrinides 2015). In insects, however, *Pantoea* have been shown to have  
470 mutualistic associations with their host. They are required for the completion of development in  
471 stinkbugs (Hosokawa *et al.* 2016; but see Dillon & Charnley 2002), produce compounds that  
472 attract insects to their host plants in flies (Robacker, Lauzon & He 2004; Maccollom *et al.* 2009),  
473 and in the orthopteran *Schistocerca gregaria*, produce a key component of the locust aggregation  
474 pheromone (Dillon, Vennard & Charnley 2000, 2002) and reduce susceptibility to microbial  
475 pathogens through the production of phenols (Dillon & Charnley 1986, 1995).

476         Our metagenomics predictions suggest that enteric bacteria in Mormon crickets might be  
477 capable of producing at least two of the antimicrobial phenols identified in *S. gregaria*, although  
478 *P. agglomerans* was not identified as an important contributor in our study. This illustrates a  
479 limitation of PICRUSt, as genomes in the IMG database used to make inferences about gene  
480 content may miss important among-strain variation in metabolic capabilities. *P. agglomerans*  
481 derived from *S. gregaria* are likely to have acquired this capability independently, unless the  
482 metabolic pathway is different from the one analyzed here or the taxonomic designation reported  
483 by Dillon and Charnley (1986, 1995) is incorrect.

484 Metagenomic analyses are also dependent upon annotation of the relevant pathways in  
485 the KEGG database. We were unable, for example, to assess the potential for the Mormon  
486 crickets microbiome to produce bacteriocins or the aggregation pheromone guaiacol, a bacterial  
487 metabolite produced by *P. agglomerans* in *S. gregaria* (Dillon *et al.* 2000, 2002), because the  
488 predicted pathways are not annotated in the KEGG database. The role of the gut microbiome in  
489 protecting Mormon crickets from their own pathogens (MacVean & Capinera 1991) and its  
490 influence on aggregation behavior (MacVean 1987; Simpson *et al.* 2006) is thus an important  
491 direction for future research.

#### 492 *Conclusion*

493 Variation in morphology and physiology is thought to differentiate niches within the gut that  
494 influence the organization of the microbiome. Our study describes at high resolution how  
495 bacterial communities vary among gut regions, and suggests that host-microbe and/or microbe-  
496 microbe interactions have a role in how microbial communities are assembled and maintained.  
497 While the metagenomics predictions gleaned from our study suggests that some of these bacteria  
498 might benefit Mormon cricket nutrition, immunity, and perhaps even modulate social behavior,  
499 experiments are needed to evaluate this possibility. Our establishment of methods for culturing  
500 Mormon cricket gut bacteria will enable experimental and comparative genomic approaches in  
501 the future to infer the ecological and evolutionary consequences of host-microbe symbiosis.

#### 502 **Data Accessibility**

503 Sequences are archived under NCBI BioProject PRJNA362233.

504 **Acknowledgements**

505 We thank Laura Senior, USDA-ARS, for help with field collections and rearing laboratory  
506 insects. We also thank Bruce Shambaugh and the Cheyenne office of USDA-APHIS, PPQ for  
507 assisting with field collections, and Nancy Moran, UT-Austin, for providing the standard for the  
508 qPCR experiment. Work was funded by National Science Foundation award DEB-1354666 and  
509 the W.M. Wheeler Lost Pines Endowment from the University of Texas at Austin to UGM.



## 510 **References**

- 511 Bates, D., Maechler, M., Bolker, B. & Walker, S. (2013) *lme4: Linear Mixed-Effects Models*  
512 *Using S4 Classes*.
- 513 Benjamini, Y. & Hochberg, Y. (1995) Controlling the false discovery rate: a practical and  
514 powerful approach to multiple testing. *Journal of the Royal Statistical Society. Series B*  
515 *(Methodological)*, **57**, 289–300.
- 516 Bernays, E. & Woodhead, S. (1984) The need for high levels of phenylalanine in the diet of  
517 *Schistocerca gregaria* nymphs. *Journal of Insect Physiology*, **30**, 489–493.
- 518 Bignell, D.E. (1984) The arthropod gut as an environment for microorganisms. *Invertebrate-*  
519 *Microbial Interactions* (eds J.M. Anderson, A.D.M. Rayner & D.W.H. Walton), pp. 205–  
520 227. Cambridge University Press, Cambridge.
- 521 Bistolas, K.S.I., Sakamoto, R.I., Fernandes, J.A.M. & Goffredi, S.K. (2014) Symbiont  
522 polyphyly, co-evolution, and necessity in pentatomid stinkbugs from Costa Rica.  
523 *Microbial Symbioses*, **5**, 349.
- 524 Blum, J.E., Fischer, C.N., Miles, J. & Handelsman, J. (2013) Frequent replenishment sustains the  
525 beneficial microbiome of *Drosophila melanogaster*. *mBio*, **4**, e00860-13.
- 526 Brenner, D.J., Krieg, N.R., Staley, J.T., Garrity, G.M., Boone, D.R., De Vos, P., Goodfellow, M.,  
527 Rainey, F.A. & Schleifer, K.-H. (eds). (2005) *Bergey's Manual® of Systematic*  
528 *Bacteriology*. Springer US, Boston, MA.
- 529 Bridson, E.Y. (ed). (1998) *The Oxoid Manual*, 8th ed. Oxoid LTD, Basingstoke, United  
530 Kingdom.
- 531 Buchon, N., Broderick, N.A. & Lemaitre, B. (2013) Gut homeostasis in a microbial world:  
532 insights from *Drosophila melanogaster*. *Nature Reviews Microbiology*, **11**, 615–626.
- 533 Bugg, T.D., Ahmad, M., Hardiman, E.M. & Singh, R. (2011) The emerging role for bacteria in  
534 lignin degradation and bio-product formation. *Current Opinion in Biotechnology*, **22**,  
535 394–400.
- 536 Callahan, B.J., McMurdie, P.J., Rosen, M.J., Han, A.W., Johnson, A.J.A. & Holmes, S.P. (2016)  
537 DADA2: High-resolution sample inference from Illumina amplicon data. *Nature*  
538 *Methods*, **13**, 581–583.
- 539 Caporaso, J.G., Kuczynski, J., Stombaugh, J., Bittinger, K., Bushman, F.D., Costello, E.K.,  
540 Fierer, N., Peña, A.G., Goodrich, J.K., Gordon, J.I., Huttley, G.A., Kelley, S.T., Knights,  
541 D., Koenig, J.E., Ley, R.E., Lozupone, C.A., McDonald, D., Muegge, B.D., Pirrung, M.,  
542 Reeder, J., Sevinsky, J.R., Turnbaugh, P.J., Walters, W.A., Widmann, J., Yatsunencko, T.,  
543 Zaneveld, J. & Knight, R. (2010) QIIME allows analysis of high-throughput community  
544 sequencing data. *Nature Methods*, **7**, 335–336.

- 545 Castex, M., Chim, L., Pham, D., Lemaire, P., Wabete, N., Nicolas, J.-L., Schmidely, P. &  
546 Mariojouis, C. (2008) Probiotic *P. acidilactici* application in shrimp *Litopenaeus*  
547 *stylirostris* culture subject to vibriosis in New Caledonia. *Aquaculture*, **275**, 182–193.
- 548 Castex, M., Lemaire, P., Wabete, N. & Chim, L. (2009) Effect of dietary probiotic *Pediococcus*  
549 *acidilactici* on antioxidant defences and oxidative stress status of shrimp *Litopenaeus*  
550 *stylirostris*. *Aquaculture*, **294**, 306–313.
- 551 Cho, I. & Blaser, M.J. (2012) The human microbiome: at the interface of health and disease.  
552 *Nature Reviews Genetics*, **13**, 260–270.
- 553 Cintas, L.M., Casaus, M.P., Herranz, C., Nes, I.F. & Hernández, P.E. (2001) Review:  
554 Bacteriocins of Lactic Acid Bacteria. *Food Science and Technology International*, **7**,  
555 281–305.
- 556 Dillon, R. & Charnley, A. (1986) Inhibition of *Metarhizium anisopliae* by the gut bacterial flora  
557 of the desert locust, *Schistocerca gregaria*: Evidence for an antifungal toxin. *Journal of*  
558 *invertebrate pathology*, **47**, 350–360.
- 559 Dillon, R.J. & Charnley, A.K. (1988) Inhibition of *Metarhizium anisopliae* by the gut bacterial  
560 flora of the desert locust: characterisation of antifungal toxins. *Canadian Journal of*  
561 *Microbiology*, **34**, 1075–1082.
- 562 Dillon, R.J. & Charnley, A.K. (1995) Chemical Barriers to Gut Infection in the Desert Locust: In  
563 Vivo Production of Antimicrobial Phenols Associated with the Bacterium *Pantoea*  
564 *agglomerans*. *Journal of Invertebrate Pathology*, **66**, 72–75.
- 565 Dillon, R. & Charnley, K. (2002) Mutualism between the desert locust *Schistocerca gregaria*  
566 and its gut microbiota. *Research in Microbiology*, **153**, 503–509.
- 567 Dillon, R.J. & Dillon, V.M. (2004) The gut bacteria of insects: nonpathogenic interactions.  
568 *Annual review of entomology*, **49**, 71–92.
- 569 Dillon, R.J., Vennard, C.T. & Charnley, A.K. (2000) Pheromones: Exploitation of gut bacteria in  
570 the locust. *Nature*, **403**, 851–851.
- 571 Dillon, R. j., Vennard, C. t. & Charnley, A. k. (2002) A Note: Gut bacteria produce components  
572 of a locust cohesion pheromone. *Journal of Applied Microbiology*, **92**, 759–763.
- 573 Douglas, A.E. (2013) Alimentary canal, digestion and absorption. *The Insects: Structure and*  
574 *Function*, 5th ed (eds S.. J. Simpson, A.E. Douglas & R.F. Chapman), pp. 46–80.  
575 Cambridge University Press, Cambridge.
- 576 Douglas, A.E. (2015) Multiorganismal Insects: Diversity and Function of Resident  
577 Microorganisms. *Annual Review of Entomology*, **60**, 17–34.
- 578 Drawz, S.M. & Bonomo, R.A. (2010) Three decades of  $\beta$ -Lactamase inhibitors. *Clinical*  
579 *Microbiology Reviews*, **23**, 160–201.

- 580 Engel, P. & Moran, N.A. (2013) The gut microbiota of insects – diversity in structure and  
581 function. *FEMS Microbiology Reviews*, **37**, 699–735.
- 582 Erkosar, B., Storelli, G., Mitchell, M., Bozonnet, L., Bozonnet, N. & Leulier, F. (2015) Pathogen  
583 virulence impedes mutualist-mediated enhancement of host juvenile growth via inhibition  
584 of protein digestion. *Cell Host & Microbe*, **18**, 445–455.
- 585 Faraway, J.J. (2006) *Extending the Linear Model with R: Generalized Linear, Mixed Effects and*  
586 *Nonparametric Regression Models*. Chapman & Hall/CRC, New York.
- 587 Forsgren, E., Olofsson, T.C., Vásquez, A. & Fries, I. (2010) Novel lactic acid bacteria inhibiting  
588 *Paenibacillus* larvae in honey bee larvae. *Apidologie*, **41**, 99–108.
- 589 González-Santoyo, I. & Córdoba-Aguilar, A. (2012) Phenoloxidase: a key component of the  
590 insect immune system. *Entomologia Experimentalis et Applicata*, **142**, 1–16.
- 591 Gwynne, D.T. (1984) Sexual selection and sexual differences in Mormon crickets (Orthoptera:  
592 Tettigoniidae, *Anabrus simplex*). *Evolution*, **38**, 1011–1022.
- 593 Herrmann, K.M. & Weaver, L.M. (1999) The shikimate pathway. *Annual review of plant*  
594 *biology*, **50**, 473–503.
- 595 Hosokawa, T., Ishii, Y., Nikoh, N., Fujie, M., Satoh, N. & Fukatsu, T. (2016) Obligate bacterial  
596 mutualists evolving from environmental bacteria in natural insect populations. *Nature*  
597 *Microbiology*, **1**, 15011.
- 598 Hothorn, T., Bretz, F. & Westfall, P. (2008) Simultaneous inference in general parametric  
599 models. *Biometrical Journal*, **50**, 346–363.
- 600 Hunt, J. & Charnley, A.K. (1981) Abundance and distribution of the gut flora of the desert  
601 locust, *Schistocerca gregaria*. *Journal of Invertebrate Pathology*, **38**, 378–385.
- 602 Kaufman, M.G. & Klug, M.J. (1991) The contribution of hindgut bacteria to dietary  
603 carbohydrate utilization by crickets (Orthoptera: Gryllidae). *Comparative Biochemistry*  
604 *and Physiology Part A: Physiology*, **98**, 117–123.
- 605 Kikuchi, Y., Meng, X.-Y. & Fukatsu, T. (2005) Gut symbiotic bacteria of the genus *Burkholderia*  
606 in the broad-headed bugs *Riptortus clavatus* and *Leptocoris chinensis* (Heteroptera:  
607 Alydidae). *Applied and Environmental Microbiology*, **71**, 4035–4043.
- 608 Köhler, T., Dietrich, C., Scheffrahn, R.H. & Brune, A. (2012) High-resolution analysis of gut  
609 environment and bacterial microbiota reveals functional compartmentation of the gut in  
610 wood-feeding higher termites (*Nasutitermes* spp.). *Applied and Environmental*  
611 *Microbiology*, **78**, 4691–4701.
- 612 Lanan, M.C., Rodrigues, P.A.P., Agellon, A., Jansma, P. & Wheeler, D.E. (2016) A bacterial  
613 filter protects and structures the gut microbiome of an insect. *The ISME Journal*.

- 614 Langille, M.G.I., Zaneveld, J., Caporaso, J.G., McDonald, D., Knights, D., Reyes, J.A.,  
615 Clemente, J.C., Burkepille, D.E., Vega Thurber, R.L., Knight, R., Beiko, R.G. &  
616 Huttenhower, C. (2013) Predictive functional profiling of microbial communities using  
617 16S rRNA marker gene sequences. *Nature Biotechnology*, **31**, 814–821.
- 618 Lehane, M.J. & Billingsley, P.F. (eds). (1996) *Biology of the Insect Midgut*. Springer  
619 Netherlands, Dordrecht.
- 620 Ley, R.E., Lozupone, C.A., Hamady, M., Knight, R. & Gordon, J.I. (2008) Worlds within  
621 worlds: evolution of the vertebrate gut microbiota. *Nature Reviews Microbiology*, **6**, 776–  
622 788.
- 623 Maccollom, G.B., Lauzon, C.R., Sjogren, R.E., Meyer, W.L. & Olday, F. (2009) Association and  
624 attraction of blueberry maggot fly curran (Diptera: Tephritidae) to *Pantoea*  
625 (*enterobacter*) *agglomerans*. *Environmental Entomology*, **38**, 116–120.
- 626 MacVean, C.. (1987) Ecology and management of the Mormon cricket, *Anabrus simplex*.  
627 *Integrated Pest Management on Rangeland: A Shortgrass Prairie Perspective*, pp. 116–  
628 136. Westview Press, Boulder, CO.
- 629 MacVean, C.M. & Capinera, J.L. (1991) Pathogenicity and transmission potential of *Nosema*  
630 locustae and *Vairimorpha* n. sp. (Protozoa: Microsporida) in Mormon crickets (*Anabrus*  
631 simplex; Orthoptera: Tettigoniidae): A laboratory evaluation. *Journal of Invertebrate*  
632 *Pathology*, **57**, 23–36.
- 633 McFrederick, Q.S., Cannone, J.J., Gutell, R.R., Kellner, K., Plowes, R.M. & Mueller, U.G.  
634 (2013) Specificity between *Lactobacilli* and hymenopteran hosts is the exception rather  
635 than the rule. *Applied and Environmental Microbiology*, **79**, 1803–1812.
- 636 McMurdie, P.J. & Holmes, S. (2013) Phyloseq: an R package for reproducible interactive  
637 analysis and graphics of microbiome census data. *PLoS ONE*, **8**, e61217.
- 638 Mead, L.J., Khachatourians, G.G. & Jones, G.A. (1988) Microbial ecology of the gut in  
639 laboratory stocks of the migratory grasshopper, *Melanoplus sanguinipes* (fab.)  
640 (Orthoptera: Acrididae). *Applied and Environmental Microbiology*, **54**, 1174–1181.
- 641 Oksanen, J., Blanchet, F.G., Kindt, R., Legendre, P., Minchin, P.R., O’Hara, R.B., Simpson,  
642 G.L., Solymos, P., Stevens, M.H.H. & Wagner, H. (2015) *Vegan: Community Ecology*  
643 *Package*.
- 644 Powell, J.E., Martinson, V.G., Urban-Mead, K. & Moran, N.A. (2014) Routes of acquisition of  
645 the gut microbiota of the honey bee *Apis mellifera*. *Applied and Environmental*  
646 *Microbiology*, **80**, 7378–7387.
- 647 R Core Development Team. (2013) *R: A Language and Environment for Statistical Computing*.  
648 R Foundation for Statistical Computing, Vienna, Austria.
- 649 Raskin, I. (1992) Role of salicylic acid in plants. *Annual review of plant biology*, **43**, 439–463.

- 650 Robacker, D.C., Lauzon, C.R. & He, X. (2004) Volatiles production and attractiveness to the  
651 Mexican fruit fly of *Enterobacter agglomerans* isolated from apple maggot and Mexican  
652 fruit flies. *Journal of Chemical Ecology*, **30**, 1329–1347.
- 653 Ryu, J.-H., Ha, E.-M. & Lee, W.-J. (2010) Innate immunity and gut–microbe mutualism in  
654 *Drosophila*. *Developmental & Comparative Immunology*, **34**, 369–376.
- 655 Servin, A.L. (2004) Antagonistic activities of lactobacilli and bifidobacteria against microbial  
656 pathogens. *FEMS Microbiology Reviews*, **28**, 405–440.
- 657 Simpson, S.J., Sword, G.A., Lorch, P.D. & Couzin, I.D. (2006) Cannibal crickets on a forced  
658 march for protein and salt. *Proceedings of the National Academy of Sciences of the*  
659 *United States of America*, **103**, 4152–4156.
- 660 Smith, C.C., Srygley, R.B., Dietrich, E.I. & Mueller, U.G. (2016) Partitioning the effect of  
661 mating and nuptial feeding on the microbiome in gift-giving insects. *Environmental*  
662 *Microbiology Reports*.
- 663 Srygley, R.B. (2012) Ontogenetic changes in immunity and susceptibility to fungal infection in  
664 Mormon crickets *Anabrus simplex*. *Journal of Insect Physiology*, **58**, 342–347.
- 665 Srygley, R.B. & Lorch, P.D. (2011) Weakness in the band: nutrient-mediated trade-offs between  
666 migration and immunity of Mormon crickets, *Anabrus simplex*. *Animal Behaviour*, **81**,  
667 395–400.
- 668 Srygley, R.B., Lorch, P.D., Simpson, S.J. & Sword, G.A. (2009) Immediate protein dietary  
669 effects on movement and the generalised immunocompetence of migrating Mormon  
670 crickets *Anabrus simplex* (Orthoptera: Tettigoniidae). *Ecological Entomology*, **34**, 663–  
671 668.
- 672 Storelli, G., Defaye, A., Erkosar, B., Hols, P., Royet, J. & Leulier, F. (2011) *Lactobacillus*  
673 *plantarum* promotes *Drosophila* systemic growth by modulating hormonal signals  
674 through TOR-dependent nutrient sensing. *Cell Metabolism*, **14**, 403–414.
- 675 Tai, V., Carpenter, K.J., Weber, P.K., Nalepa, C.A., Perlman, S.J. & Keeling, P.J. (2016)  
676 Genome evolution and nitrogen fixation in bacterial ectosymbionts of a protist inhabiting  
677 wood-feeding cockroaches. *Applied and Environmental Microbiology*, **82**, 4682–4695.
- 678 Ulrich, R.G., Buthala, D.A. & Klug, M.J. (1981) Microbiota associated with the gastrointestinal  
679 tract of the common house cricket, *Acheta domestica*. *Applied and Environmental*  
680 *Microbiology*, **41**, 246–254.
- 681 Venables, W.N. & Ripley, B.D. (2002) *Modern Applied Statistics with S*, Fourth. Springer, New  
682 York.
- 683 Walterson, A.M. & Stavriniades, J. (2015) Pantoea: insights into a highly versatile and diverse  
684 genus within the Enterobacteriaceae. *FEMS Microbiology Reviews*, fuv027.

- 685 Woodring, J. & Lorenz, M.W. (2007) Feeding, nutrient flow, and functional gut morphology in  
686 the cricket *Gryllus bimaculatus*. *Journal of Morphology*, **268**, 815–825.
- 687 Xu, W.-H., Liang, Q., Zhang, Y.-J. & Zhao, P. (2015) Naturally occurring arbutin derivatives  
688 and their bioactivities. *Chemistry & Biodiversity*, **12**, 54–81.
- 689 Yuan, S., Cohen, D.B., Ravel, J., Abdo, Z. & Forney, L.J. (2012) Evaluation of methods for the  
690 extraction and purification of dna from the human microbiome. *PLoS ONE*, **7**, e33865.
- 691
- 692

693 **Figures and Tables**

694  
 695 Table 1. Analysis of deviance comparing alpha diversity between source populations (wild or laboratory) and among tissue types  
 696 (foregut, midgut, and hindgut). Values represent the F-statistic (p-value) for each term. Statistically significant terms (p<0.05) are  
 697 indicated in bold. Degrees of freedom were estimated using the Kenward-Rogers approximation. In the reduced dataset, two  
 698 individuals from the laboratory-reared population were removed (see Methods).

|             | <b>Reduced Dataset</b> |                     |                     | <b>Full Dataset</b> |                     |                     |
|-------------|------------------------|---------------------|---------------------|---------------------|---------------------|---------------------|
|             | Species<br>Richness    | Chao1               | Shannon-<br>Weiner  | Species<br>Richness | Chao1               | Shannon-<br>Weiner  |
| Source      | <b>13.9 (0.003)</b>    | <b>11.0 (0.007)</b> | <b>9.17(0.01)</b>   | <b>14.0(0.002)</b>  | <b>10.5 (0.006)</b> | <b>8.22 (0.013)</b> |
| Tissue type | <b>5.85 (0.010)</b>    | <b>4.79 (0.02)</b>  | <b>7.07 (0.005)</b> | <b>6.77 (0.004)</b> | <b>5.68 (0.008)</b> | <b>8.44 (0.001)</b> |
| Interaction | 0.51 (0.61)            | 1.02 (0.38)         | 0.98 (0.39)         | 0.66 (0.53)         | 1.15 (0.33)         | 1.28 (0.29)         |

Table 2. Permutation tests of distance-based redundancy analyses of DADA2 16S rRNA sequence variants and PICRUS<sub>t</sub> metagenomic predictions. Source population (wild or laboratory) and tissue type (foregut, midgut and hindgut) were entered as factors.

|                           | <b>Reduced Dataset</b> |                  | <b>Full Dataset</b> |                  |
|---------------------------|------------------------|------------------|---------------------|------------------|
|                           | <i>F</i>               | <i>P</i>         | <i>F</i>            | <i>P</i>         |
| <u>DADA2</u>              |                        |                  |                     |                  |
| Source                    | <b>8.99</b>            | <b>&lt;0.001</b> | <b>7.75</b>         | <b>&lt;0.001</b> |
| Tissue type               | <b>9.85</b>            | <b>&lt;0.001</b> | <b>5.49</b>         | <b>&lt;0.001</b> |
| Interaction               | 0.26                   | 0.47             | 0.52                | 0.84             |
| <br>                      |                        |                  |                     |                  |
| <u>PICRUS<sub>t</sub></u> |                        |                  |                     |                  |
| Source                    | 0.23                   | 0.76             | <b>4.31</b>         | <b>0.04</b>      |
| Tissue type               | <b>1.61</b>            | <b>0.003</b>     | <b>8.09</b>         | <b>0.002</b>     |
| Interaction               | 0.16                   | 0.35             | 0.92                | 0.43             |



Table 3. Likelihood ratio tests from GLMMs fitting the abundance of sequence variants to source population (wild or laboratory) and tissue type (foregut, midgut or hindgut). Values are Chi-square (p-value). LAC1=*Lactobacillus sp.*, PED=*Pediococcus*, PAG=*Pantoea agglomerans*.

|             | Reduced Dataset         |                    |                         | Full Dataset        |                         |                         |
|-------------|-------------------------|--------------------|-------------------------|---------------------|-------------------------|-------------------------|
|             | LAC1                    | PED                | PAG                     | LAC1                | PED                     | PAG                     |
| Source      | 1.32 (0.25)             | 0.80 (0.37)        | 2.36 (0.12)             | 0.18 (0.66)         | 0.51 (0.48)             | 0.01 (0.96)             |
| Tissue type | <b>16.3 (&lt;0.001)</b> | <b>9.25 (0.01)</b> | <b>20.7 (&lt;0.001)</b> | <b>12.7 (0.002)</b> | <b>16.1 (&lt;0.001)</b> | <b>41.9 (&lt;0.001)</b> |
| Interaction | 0.36 (0.84)             | 0.84 (0.66)        | 3.86 (0.15)             | 0.3 (0.86)          | 0.95 (0.62)             | 2.67 (0.26)             |

Table 4. Permutation test of distance-based redundancy analysis of PICRUSt metagenomics predictions between source populations (wild or laboratory) and among tissue types (foregut, midgut and hindgut).

|                          | <b>Reduced Dataset</b> |                  | <b>Full Dataset</b> |                  |
|--------------------------|------------------------|------------------|---------------------|------------------|
|                          | <i>F</i>               | <i>P</i>         | <i>F</i>            | <i>P</i>         |
| <u>Illumina 16S rRNA</u> |                        |                  |                     |                  |
| Source                   | <b>8.99</b>            | <b>&lt;0.001</b> | <b>7.75</b>         | <b>&lt;0.001</b> |
| Tissue type              | <b>9.85</b>            | <b>&lt;0.001</b> | <b>5.49</b>         | <b>&lt;0.001</b> |
| Interaction              | 0.26                   | 0.47             | 0.52                | 0.84             |
| <u>KEGG Pathways</u>     |                        |                  |                     |                  |
| Source                   | 0.23                   | 0.76             | <b>4.31</b>         | <b>0.04</b>      |
| Tissue type              | <b>1.61</b>            | <b>0.003</b>     | <b>8.09</b>         | <b>0.002</b>     |
| Interaction              | 0.16                   | 0.35             | 0.92                | 0.43             |

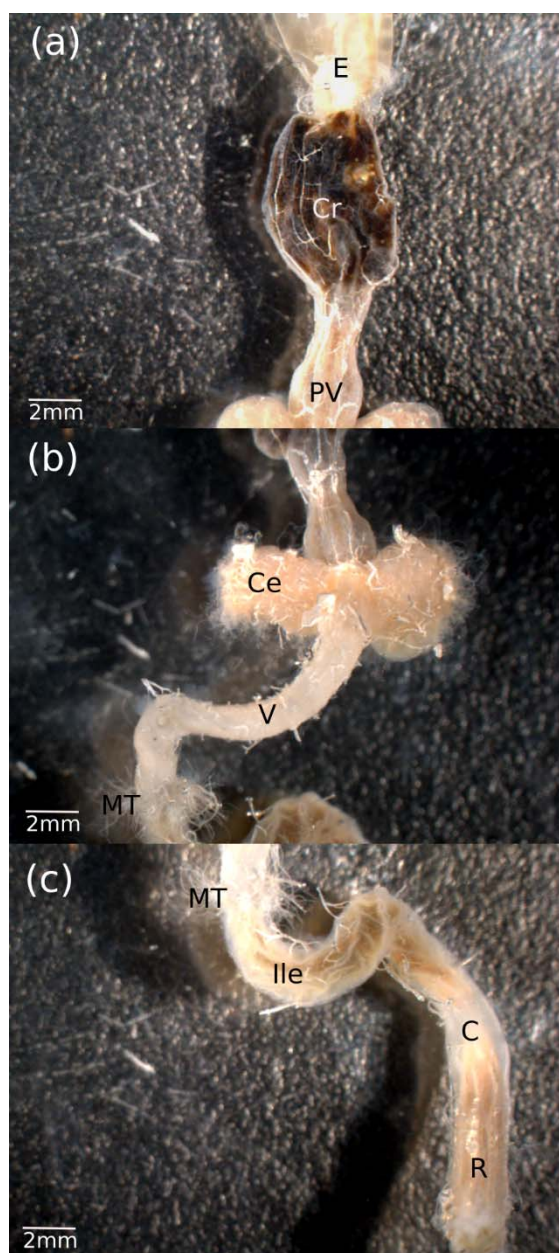

Figure 1. External morphology of the (a) foregut, (b) midgut, and (c) hindgut in the Mormon cricket. E=esophagus, Cr=crop, PV=proventriculus, Ce=cecum, V=ventriculus, MT=Malphigian tubules, Ile=ileum, C=colon, R=rectum. Malphigian tubules have been trimmed to illustrate their entry point into the hindgut.

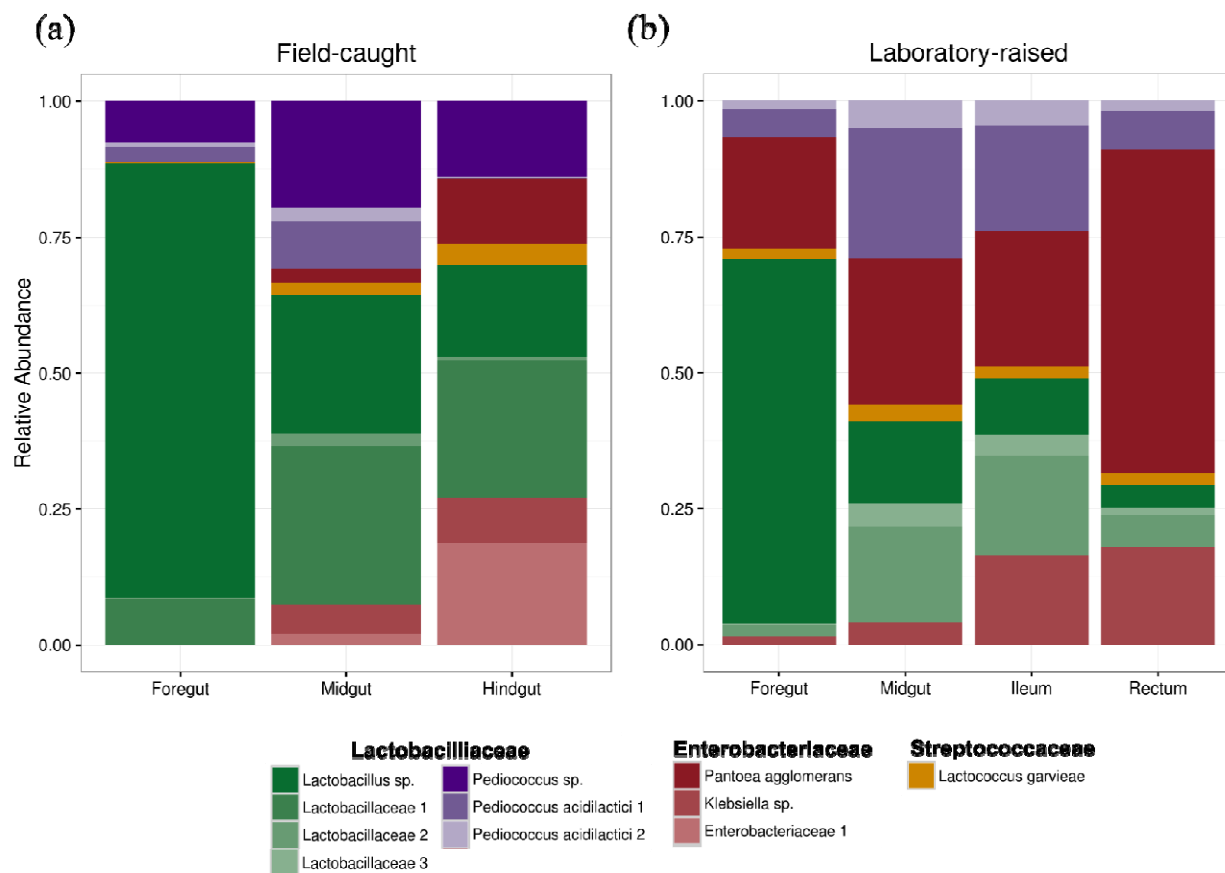

Figure 2. Mean relative abundance of the eleven dominant sequence variants from (a) field-caught and (b) laboratory-raised Mormon crickets from 16S rRNA Illumina sequencing.

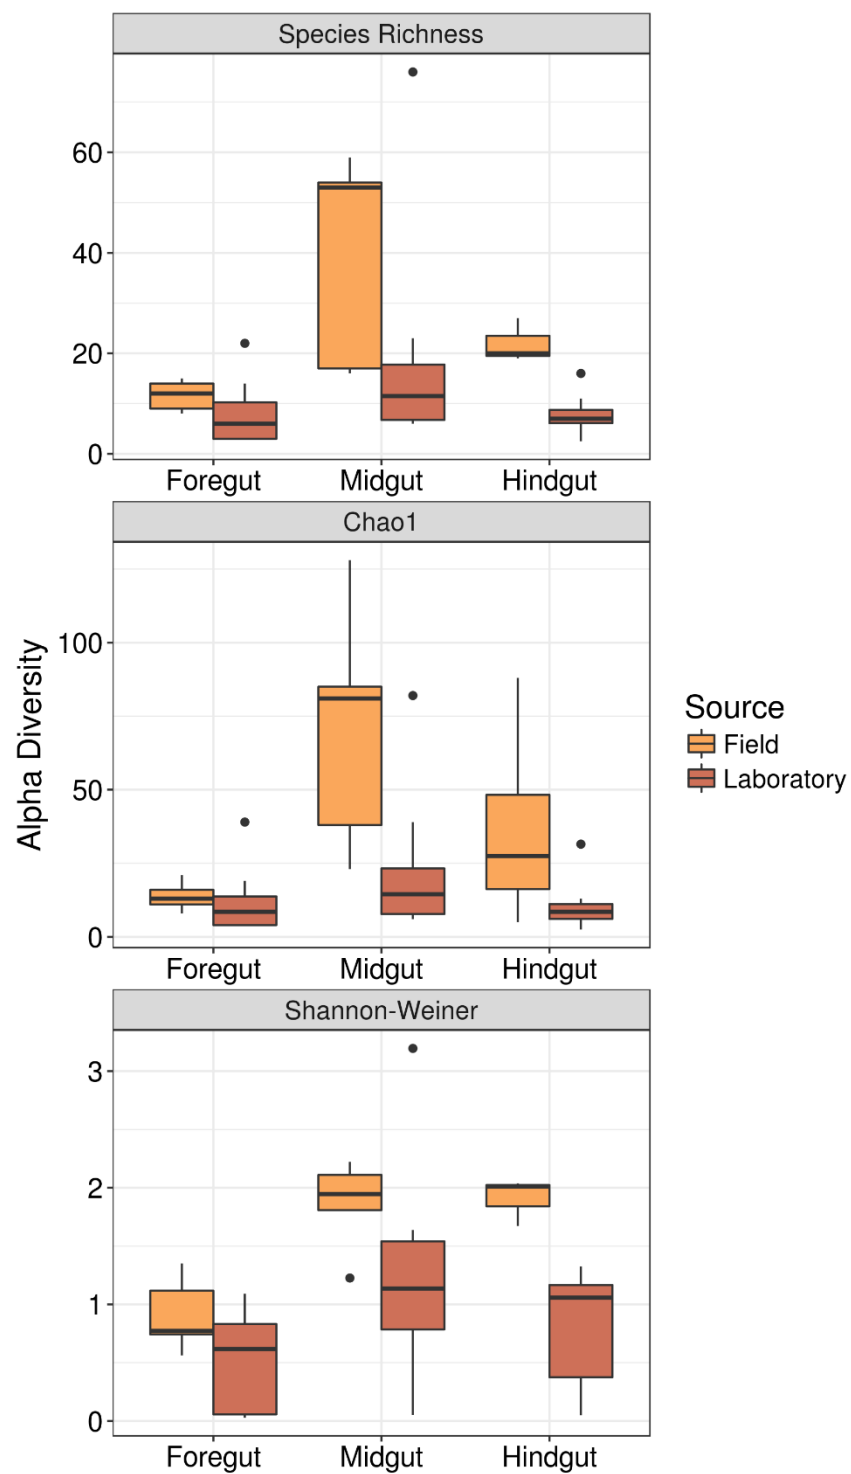

Figure 3. Alpha diversity in field-caught and laboratory-raised Mormon crickets.

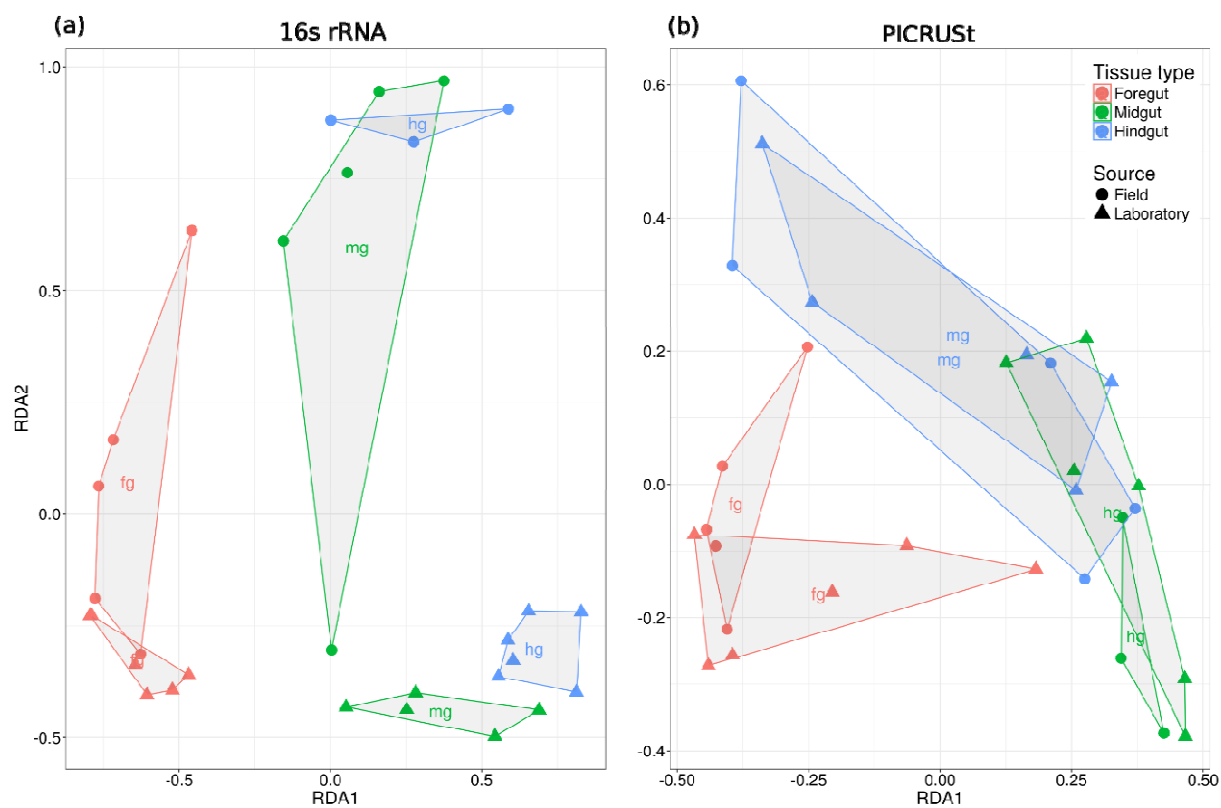

Figure 4. Ordination of sample scores from the db-RDA of the reduced dataset for (a) Illumina 16S sequencing and (b) PICRUSt metagenomic predictions.

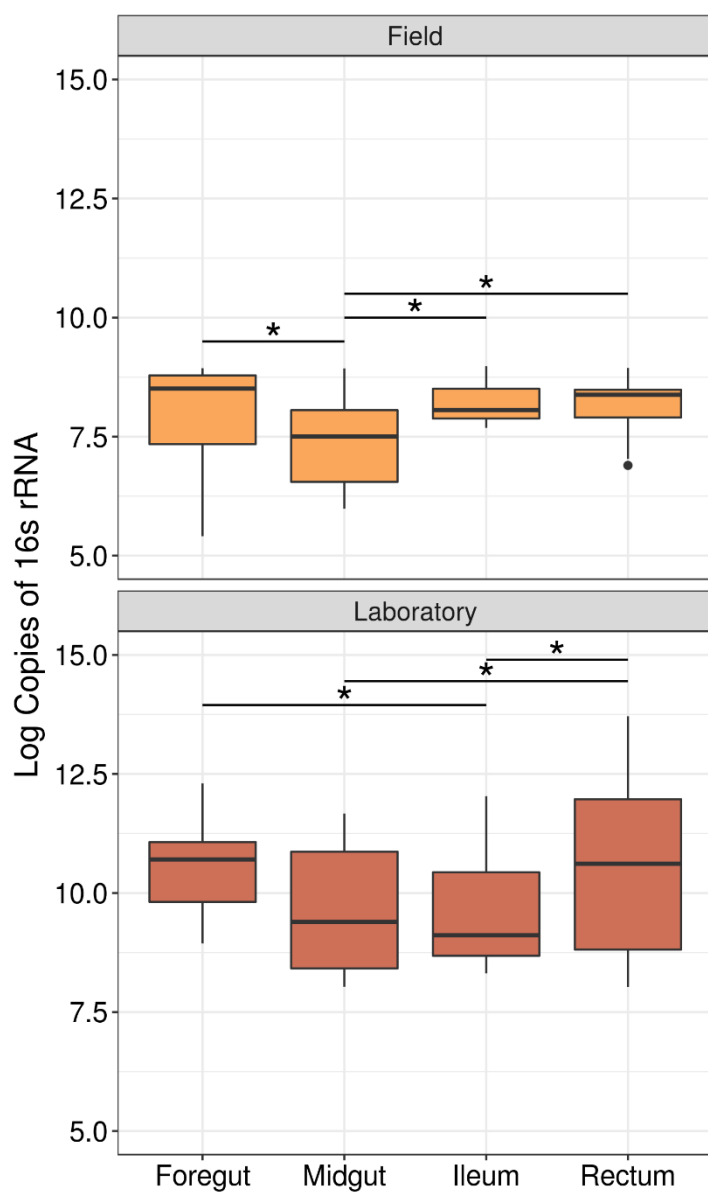

Figure 5. Abundance of bacterial 16S rRNA genes in the Mormon crickets gut. Bars indicate significant differences between regions (\*  $p < 0.05$ ).

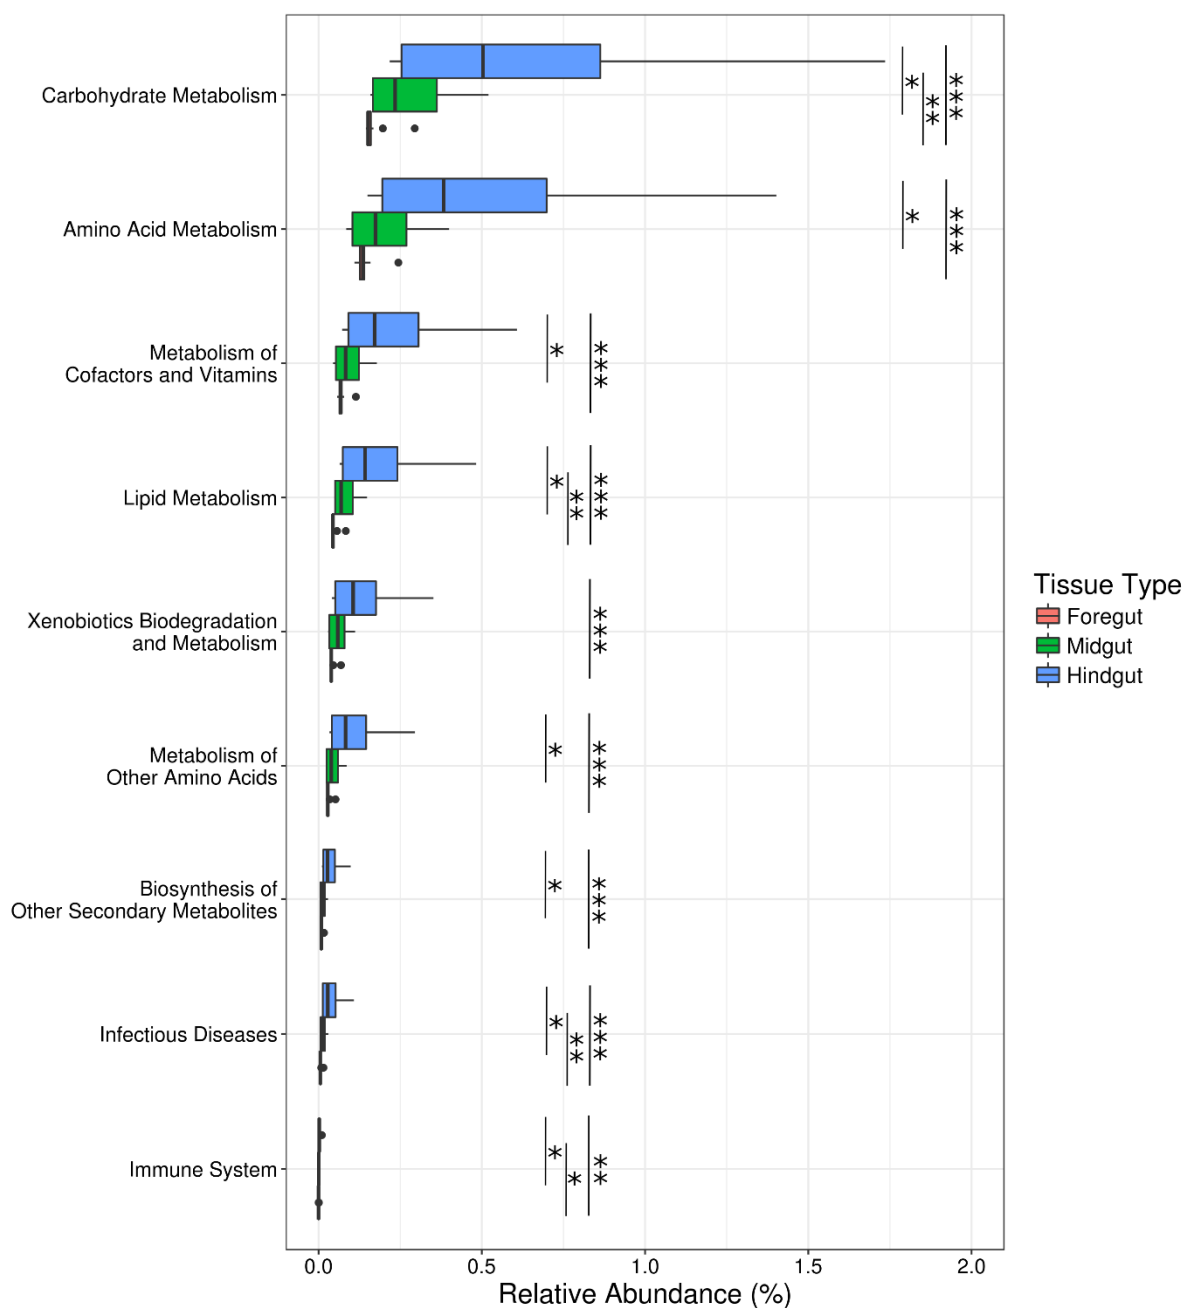

Figure 6. Relative abundance of KEGG pathways related to nutrition, immunity, xenobiotic degradation, and secondary metabolite production among tissue types.



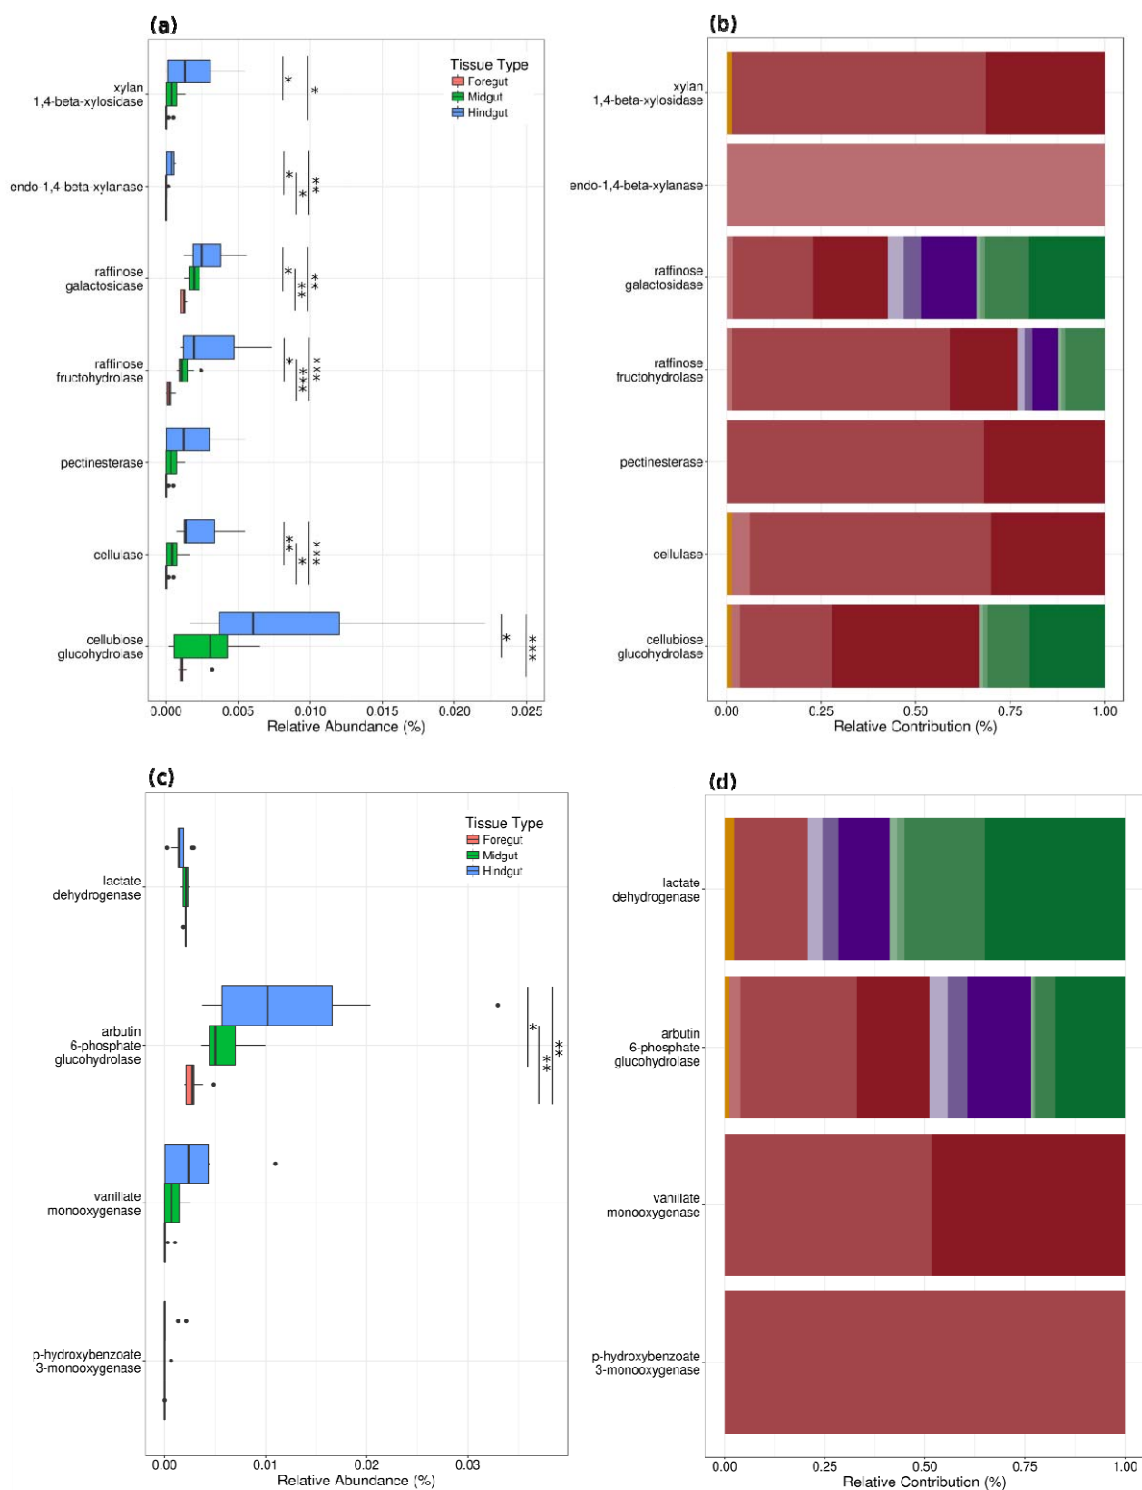

Figure 7. Abundance of KEGG orthologs related to (a) carbohydrate metabolism and (b) antimicrobial compound production among tissue types, and the contributions of taxonomic groups (c,d) to ortholog abundance. Key for colors representing taxonomic groups are in Figure 2.

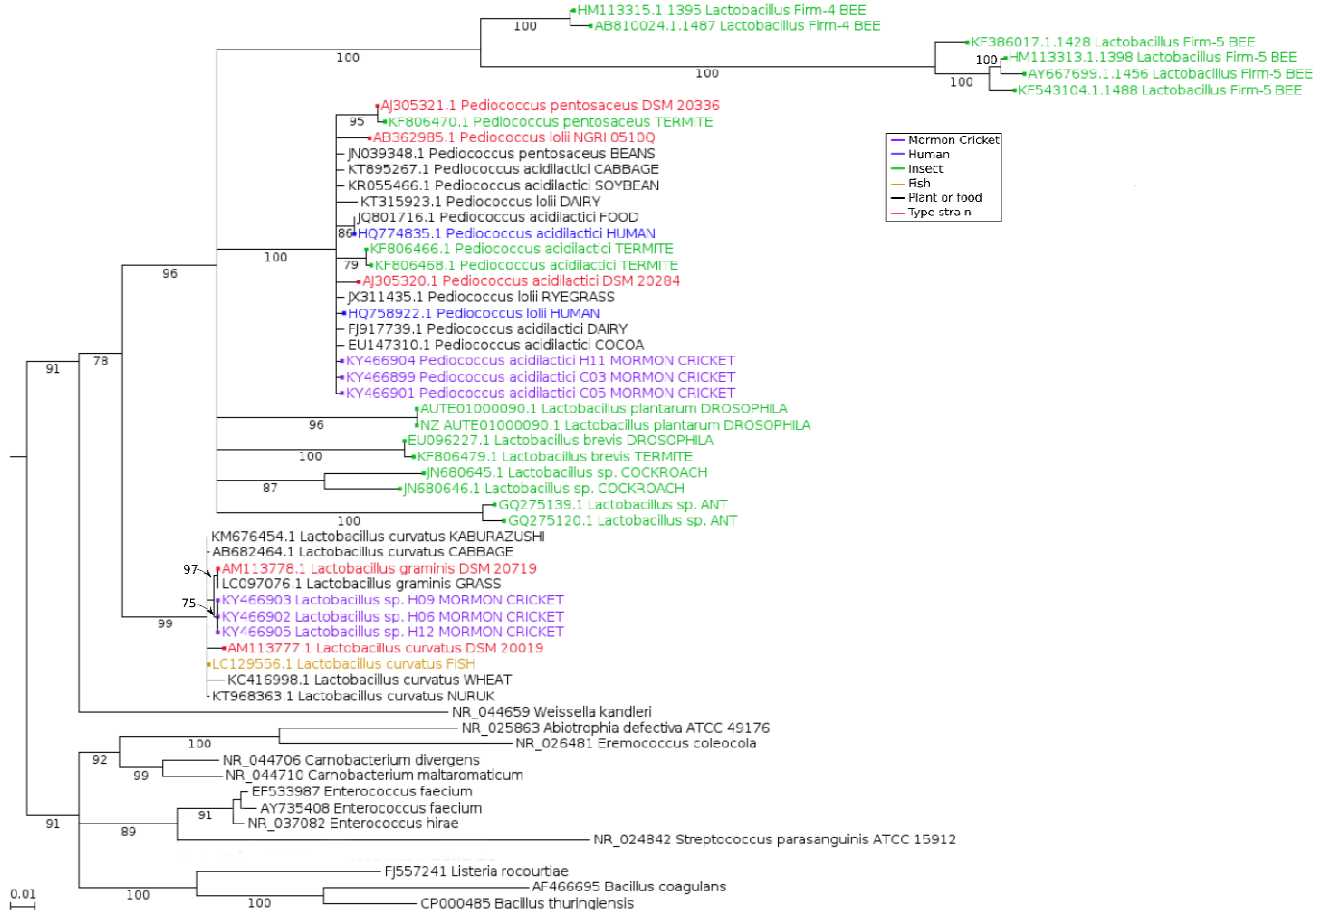

Fig 8. Maximum likelihood estimation of phylogenetic relationships among lactic-acid bacteria 16S rRNA sequences from Mormon cricket gut isolates and their relatives. Branches with bootstrap support <75% are collapsed.

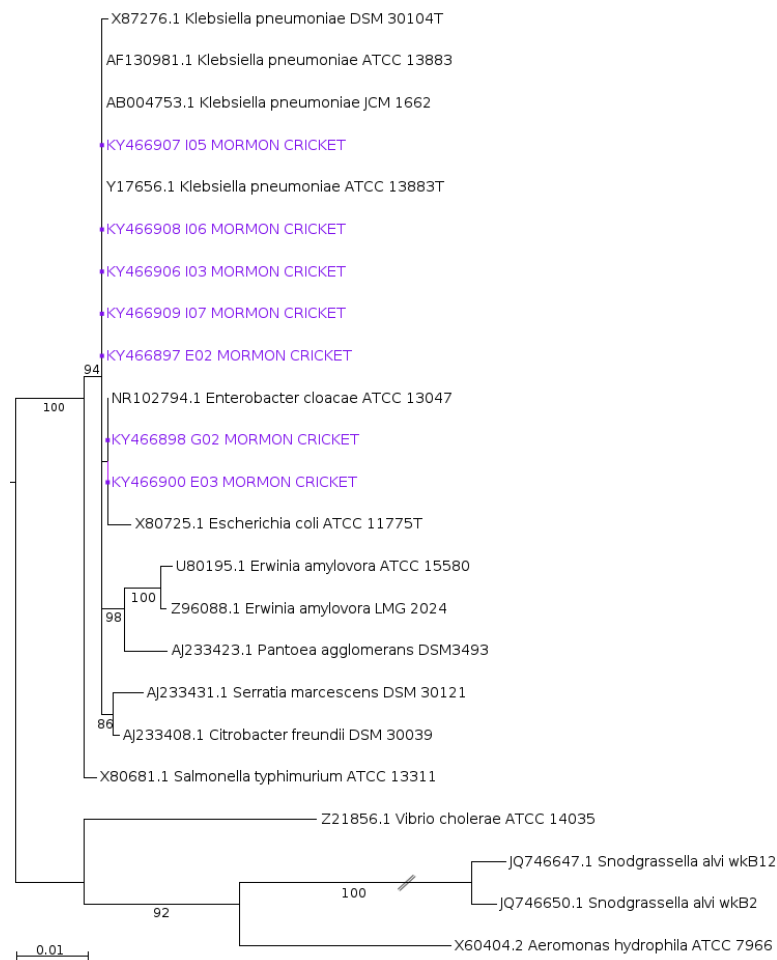

Figure 9. Maximum likelihood estimation of phylogenetic relationships among enteric bacteria 16S rRNA sequences from Mormon cricket gut isolates and type strains. Branches with bootstrap support <50% are collapsed.
